# Supplementary material
Source: publisher figshare collection journal article supplement (https://sage.figshare.com/ndownloader/files/22659158)
Supplement: Supplementary file 1 [file 22659158]

## Appendix 2: Structured interview guide at follow-up

| Question                                                                                                                                                   | Response categories                                                                                           |
|------------------------------------------------------------------------------------------------------------------------------------------------------------|---------------------------------------------------------------------------------------------------------------|
| <b>Theme I: Medication list at follow-up</b>                                                                                                               |                                                                                                               |
| Which medication are you taking to day?                                                                                                                    | List the medication and doses                                                                                 |
| If they say something different than the medication listed in the discharge letter:                                                                        | Yes/No                                                                                                        |
| Have there been made any changes in your medication since you were discharged?                                                                             |                                                                                                               |
| Who has made the prescription changes?                                                                                                                     | A doctor on the hospital<br>The general practitioner<br>Other<br>Nobody                                       |
| <b>Theme II: Perception of medication management at the Cardiology unit, Randers Regional Hospital</b>                                                     |                                                                                                               |
| Please rate your level of satisfaction with the way you received medication during your hospitalisation in the Cardiology Unit, Randers Regional Hospital? | 1 – very unsatisfactory<br>2 – unsatisfactory<br>3 – Neither/nor<br>4 – Satisfactory<br>5 – very satisfactory |
| Would you prefer self-administration of your medication for a future hospitalisation?                                                                      | Yes/No                                                                                                        |
| <b>Theme III: Perceptions about medication (Beliefs about Medicines Questionnaire © Professor Rob Horne)*</b>                                              |                                                                                                               |
| <b>BMQ-specific</b>                                                                                                                                        |                                                                                                               |
| My health, at present, depends on my medicines                                                                                                             | 1 - strongly disagree to 5 - strongly agree                                                                   |
| Having to take my medicines worries me                                                                                                                     | 1 - strongly disagree to 5 - strongly agree                                                                   |
| My life would be impossible without my medicines                                                                                                           | 1 - strongly disagree to 5 - strongly agree                                                                   |
| Without my medicines I would be very ill                                                                                                                   | 1 - strongly disagree to 5 - strongly agree                                                                   |
| I sometimes worry about the long-term effects of my medicines                                                                                              | 1 - strongly disagree to 5 - strongly agree                                                                   |
| My medicines are a mystery to me                                                                                                                           | 1 - strongly disagree to 5 - strongly agree                                                                   |
| My health in the future will depend on my medicines                                                                                                        | 1 - strongly disagree to 5 - strongly agree                                                                   |
| My medicines disrupt my life                                                                                                                               | 1 - strongly disagree to 5 - strongly agree                                                                   |
| I sometimes worry about becoming too dependent on my medicines                                                                                             | 1 - strongly disagree to 5 - strongly agree                                                                   |
| My medicines protect me from becoming worse                                                                                                                | 1 - strongly disagree to 5 - strongly agree                                                                   |
| <b>BMQ-General</b>                                                                                                                                         |                                                                                                               |
| Doctors use too many medicines                                                                                                                             | 1 - strongly disagree to 5 - strongly agree                                                                   |
| People who take medicines should stop their treatment for a while every now and again                                                                      | 1 - strongly disagree to 5 - strongly agree                                                                   |
| Most medicines are addictive                                                                                                                               | 1 - strongly disagree to 5 - strongly agree                                                                   |
| Natural remedies are safer than medicines                                                                                                                  | 1 - strongly disagree to 5 - strongly agree                                                                   |
| Medicines do more harm than good                                                                                                                           | 1 - strongly disagree to 5 - strongly agree                                                                   |
| All medicines are poisons                                                                                                                                  | 1 - strongly disagree to 5 - strongly agree                                                                   |
| Doctors place too much trust on medicines                                                                                                                  | 1 - strongly disagree to 5 - strongly agree                                                                   |
| If doctors had more time they would prescribe fewer medicines                                                                                              | 1 - strongly disagree to 5 - strongly agree                                                                   |

\*Reference:

19 Horne R, Weinman J, Hankins M. The beliefs about medicines questionnaire: The development and evaluation of a new method for assessing the cognitive representation of medication. *Psychol Health* 1999;14:1-24  
doi:10.1080/08870449908407311.
